# Supplementary material for: Structures and charge transport properties of “selenosulflower” and its selenium analogue “selflower”: computer-aided design of high-performance ambipolar organic semiconductors
Source: Royal Society of Chemistry journal article supplement (doi:10.1039/c4tc02655a), 2015-01-01

## Supporting Information

### Structures and Charge Transport Properties of “Selenosulflower” and its Selenium Analogue “Selflower”: Computer-Aided Design of High-Performance Ambipolar Organic Semiconductors

Jun Yin, Kadali Chaitanya, Xue-Hai Ju

Table S1. Optimized bond lengths of ground, anionic and cationic states for the C<sub>16</sub>S<sub>4</sub>Se<sub>4</sub> molecule at the B3P86/6-31G (d,p) level

| Index | Bond length | Ground state | Anion state | Cation state | $\Delta(\text{A-G})^a$ | $\Delta(\text{C-G})^b$ |
|-------|-------------|--------------|-------------|--------------|------------------------|------------------------|
| 1     | $R_{1-2}$   | 1.437        | 1.433       | 1.434        | -0.003                 | -0.002                 |
| 2     | $R_{1-9}$   | 1.385        | 1.390       | 1.387        | 0.005                  | 0.002                  |
| 3     | $R_{9-10}$  | 1.748        | 1.760       | 1.736        | 0.012                  | -0.011                 |
| 4     | $R_{10-11}$ | 1.747        | 1.759       | 1.738        | 0.012                  | -0.010                 |
| 5     | $R_{2-3}$   | 1.439        | 1.436       | 1.430        | -0.003                 | -0.009                 |
| 6     | $R_{2-11}$  | 1.385        | 1.390       | 1.386        | 0.005                  | 0.001                  |
| 7     | $R_{11-12}$ | 1.883        | 1.894       | 1.894        | 0.011                  | 0.011                  |
| 8     | $R_{12-13}$ | 1.883        | 1.893       | 1.866        | 0.010                  | -0.017                 |
| 9     | $R_{3-4}$   | 1.437        | 1.434       | 1.420        | -0.003                 | -0.017                 |
| 10    | $R_{3-13}$  | 1.385        | 1.390       | 1.401        | 0.005                  | 0.016                  |
| 11    | $R_{13-14}$ | 1.747        | 1.759       | 1.752        | 0.012                  | 0.004                  |
| 12    | $R_{14-15}$ | 1.747        | 1.759       | 1.751        | 0.012                  | 0.003                  |
| 13    | $R_{4-5}$   | 1.439        | 1.436       | 1.429        | -0.003                 | -0.009                 |
| 14    | $R_{4-15}$  | 1.385        | 1.390       | 1.402        | 0.005                  | 0.017                  |
| 15    | $R_{15-16}$ | 1.883        | 1.893       | 1.867        | 0.010                  | -0.016                 |
| 16    | $R_{16-17}$ | 1.883        | 1.893       | 1.895        | 0.010                  | 0.012                  |
| 17    | $R_{5-6}$   | 1.437        | 1.433       | 1.434        | -0.003                 | -0.002                 |
| 18    | $R_{5-17}$  | 1.385        | 1.390       | 1.387        | 0.005                  | 0.002                  |
| 19    | $R_{17-18}$ | 1.748        | 1.760       | 1.736        | 0.012                  | -0.011                 |
| 20    | $R_{18-19}$ | 1.747        | 1.759       | 1.738        | 0.012                  | -0.010                 |
| 21    | $R_{6-7}$   | 1.439        | 1.436       | 1.430        | -0.003                 | -0.009                 |
| 22    | $R_{6-19}$  | 1.385        | 1.390       | 1.386        | 0.005                  | 0.001                  |
| 23    | $R_{19-20}$ | 1.883        | 1.894       | 1.894        | 0.011                  | 0.011                  |
| 24    | $R_{20-21}$ | 1.883        | 1.893       | 1.866        | 0.010                  | -0.017                 |
| 25    | $R_{7-8}$   | 1.437        | 1.434       | 1.420        | -0.003                 | -0.017                 |
| 26    | $R_{7-21}$  | 1.385        | 1.390       | 1.401        | 0.005                  | 0.016                  |
| 27    | $R_{21-22}$ | 1.747        | 1.759       | 1.752        | 0.012                  | 0.004                  |

|    |             |       |       |       |        |        |
|----|-------------|-------|-------|-------|--------|--------|
| 28 | $R_{22-23}$ | 1.747 | 1.759 | 1.751 | 0.012  | 0.003  |
| 29 | $R_{8-1}$   | 1.439 | 1.436 | 1.429 | -0.003 | -0.009 |
| 30 | $R_{8-23}$  | 1.385 | 1.390 | 1.402 | 0.005  | 0.017  |
| 31 | $R_{23-24}$ | 1.883 | 1.893 | 1.867 | 0.010  | -0.016 |
| 32 | $R_{24-9}$  | 1.883 | 1.893 | 1.895 | 0.010  | 0.012  |

---

<sup>a</sup> the bond length difference between the anionic and neutral geometries. <sup>b</sup> the bond length difference between the cationic and neutral geometries.

Table S2. Optimized bond lengths of ground, anionic and cationic states for the  $C_{16}S_4Se_4$  molecule at the B3P86/6-31G (d,p) level

| Index | Bond length | Ground state | Anion state | Cation state | $\Delta(A-G)^a$ | $\Delta(C-G)^b$ |
|-------|-------------|--------------|-------------|--------------|-----------------|-----------------|
| 1     | $R_{1-2}$   | 1.442        | 1.439       | 1.437        | -0.004          | -0.005          |
| 2     | $R_{1-9}$   | 1.386        | 1.391       | 1.397        | 0.005           | 0.011           |
| 3     | $R_{9-10}$  | 1.853        | 1.863       | 1.837        | 0.010           | -0.017          |
| 4     | $R_{10-11}$ | 1.853        | 1.863       | 1.856        | 0.010           | 0.003           |
| 5     | $R_{2-3}$   | 1.442        | 1.439       | 1.439        | -0.004          | -0.003          |
| 6     | $R_{2-11}$  | 1.386        | 1.391       | 1.385        | 0.005           | -0.001          |
| 7     | $R_{11-12}$ | 1.853        | 1.863       | 1.850        | 0.010           | -0.003          |
| 8     | $R_{12-13}$ | 1.853        | 1.863       | 1.838        | 0.010           | -0.016          |
| 9     | $R_{3-4}$   | 1.442        | 1.439       | 1.429        | -0.004          | -0.013          |
| 10    | $R_{3-13}$  | 1.386        | 1.391       | 1.392        | 0.005           | 0.006           |
| 11    | $R_{13-14}$ | 1.853        | 1.863       | 1.864        | 0.010           | 0.011           |
| 12    | $R_{14-15}$ | 1.853        | 1.863       | 1.844        | 0.010           | -0.009          |
| 13    | $R_{4-5}$   | 1.442        | 1.439       | 1.427        | -0.004          | -0.015          |
| 14    | $R_{4-15}$  | 1.386        | 1.391       | 1.405        | 0.005           | 0.019           |
| 15    | $R_{15-16}$ | 1.853        | 1.863       | 1.850        | 0.010           | -0.003          |
| 16    | $R_{16-17}$ | 1.853        | 1.863       | 1.862        | 0.010           | 0.009           |
| 17    | $R_{5-6}$   | 1.442        | 1.439       | 1.437        | -0.004          | -0.005          |
| 18    | $R_{5-17}$  | 1.386        | 1.391       | 1.397        | 0.005           | 0.011           |
| 19    | $R_{17-18}$ | 1.853        | 1.863       | 1.837        | 0.010           | -0.017          |
| 20    | $R_{18-19}$ | 1.853        | 1.863       | 1.856        | 0.010           | 0.003           |
| 21    | $R_{6-7}$   | 1.442        | 1.439       | 1.439        | -0.004          | -0.003          |
| 22    | $R_{6-19}$  | 1.386        | 1.391       | 1.385        | 0.005           | -0.001          |
| 23    | $R_{19-20}$ | 1.853        | 1.863       | 1.850        | 0.010           | -0.003          |
| 24    | $R_{20-21}$ | 1.853        | 1.863       | 1.838        | 0.010           | -0.016          |
| 25    | $R_{7-8}$   | 1.442        | 1.439       | 1.429        | -0.004          | -0.013          |
| 26    | $R_{7-21}$  | 1.386        | 1.391       | 1.392        | 0.005           | 0.006           |
| 27    | $R_{21-22}$ | 1.853        | 1.863       | 1.864        | 0.010           | 0.011           |
| 28    | $R_{22-23}$ | 1.853        | 1.863       | 1.844        | 0.010           | -0.009          |
| 29    | $R_{8-1}$   | 1.442        | 1.439       | 1.427        | -0.004          | -0.015          |
| 30    | $R_{8-23}$  | 1.386        | 1.391       | 1.405        | 0.005           | 0.019           |
| 31    | $R_{23-24}$ | 1.853        | 1.863       | 1.850        | 0.010           | -0.003          |
| 32    | $R_{24-9}$  | 1.853        | 1.863       | 1.862        | 0.010           | 0.009           |

<sup>a</sup> the bond length difference between the anionic and neutral geometries. <sup>b</sup> the bond length difference between the cationic and neutral geometries.

Figure S1. Bond-length variations of the  $C_{16}S_4Se_4$  upon oxidation and reduction

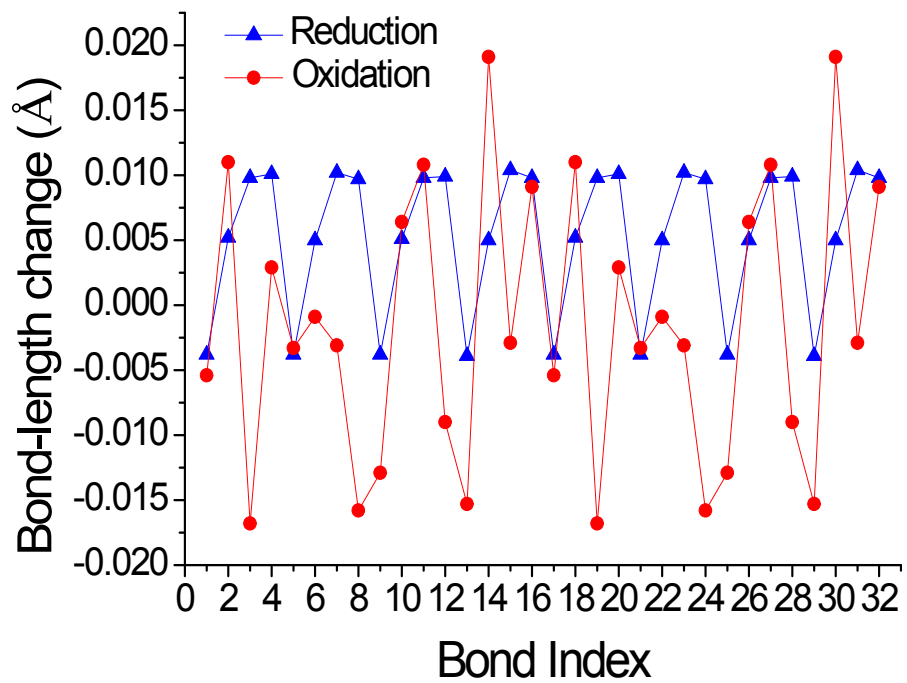

Figure S2. Bond-length variations of the  $C_{16}Se_8$  upon oxidation and reduction

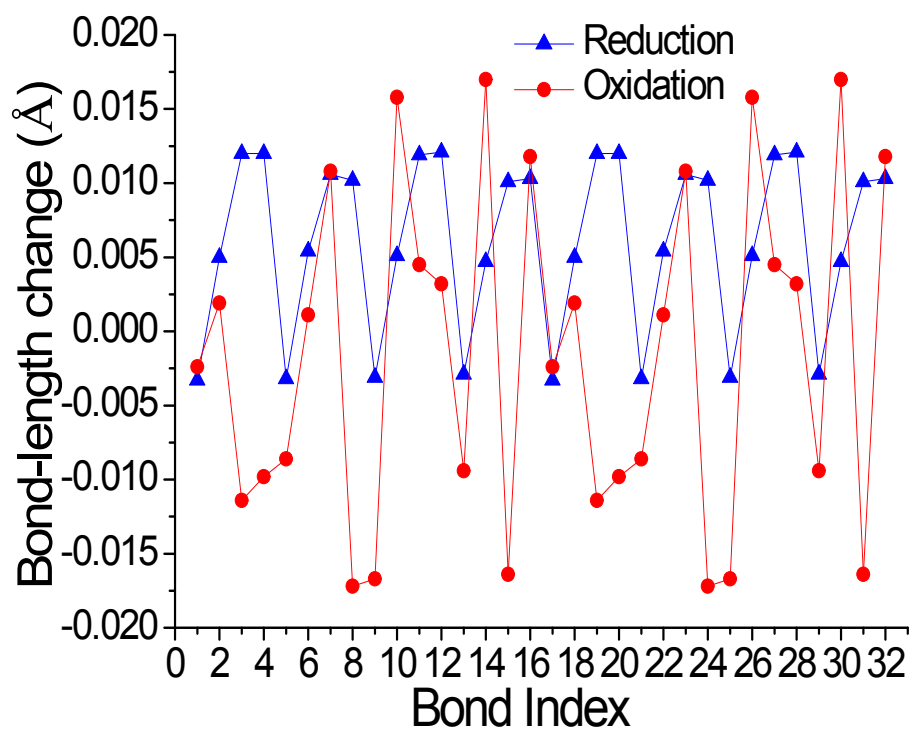

Supplement: c4tc02655a1.pdf [file c4tc02655a1.pdf]
